# Supplementary material for: Transcriptomics and Co-expression Network Profiling of Effects of Levamisole Hydrochloride on Bursaphelenchus Xylophilus
Source: Research Square preprint supplement (doi:10.21203/rs.3.rs-142801/v1), 2021-01-11
Supplement: Supplementary file 1 [file 5cad30df56f42f25e928bb96.xlsx]

## Sheet: Sheet1
Table S6. Edge weight for Profiles 7
gene.names	gene.test	pvalues
BUX.gene.s01198.106	BUX.gene.s00600.44	0.000238914
BUX.gene.s00422.56	BUX.gene.s00600.44	0.00120682
BUX.gene.s01144.54	BUX.gene.s00600.44	0.00490701
BUX.gene.s00713.708	BUX.gene.s00600.44	0.00490701
BUX.gene.s00351.45	BUX.gene.s00600.44	0.0132104
BUX.gene.s00252.94	BUX.gene.s00600.44	0.0132104
BUX.gene.s00579.211	BUX.gene.s00600.44	0.0132104
BUX.gene.s00579.346	BUX.gene.s00600.44	0.0283707
BUX.gene.s00373.2	BUX.gene.s00600.44	0.0283707
BUX.gene.s00083.35	BUX.gene.s00600.44	0.0283707
BUX.gene.s00110.134	BUX.gene.s00600.44	0.046335
BUX.gene.s00713.708	BUX.gene.s01518.76	0.0528115
BUX.gene.s00460.162	BUX.gene.s00600.44	0.0528115
BUX.gene.s00333.129	BUX.gene.s00600.44	0.0528115
BUX.gene.s01144.121	BUX.gene.s00600.44	0.0528115
BUX.gene.s00351.45	BUX.gene.s01518.76	0.089068
BUX.gene.s00466.125	BUX.gene.s00600.44	0.089068
BUX.gene.s00647.16	BUX.gene.s00600.44	0.101685
BUX.gene.s00298.174	BUX.gene.s01518.76	0.139742
Bursaphelenchus_xylophilus_newGene_1257	BUX.gene.s00600.44	0.139742
BUX.gene.s00139.144	BUX.gene.s00600.44	0.139742
BUX.gene.s01198.106	BUX.gene.s01518.76	0.157132
BUX.gene.s00713.1002	BUX.gene.s00600.44	0.157132
BUX.gene.s00713.1084	BUX.gene.s00600.44	0.207468
BUX.gene.s01259.83	BUX.gene.s00600.44	0.207468
BUX.gene.s00579.210	BUX.gene.s00600.44	0.207468
Bursaphelenchus_xylophilus_newGene_574	BUX.gene.s00600.44	0.207468
Bursaphelenchus_xylophilus_newGene_306	BUX.gene.s01518.76	0.294879
BUX.gene.s00373.2	BUX.gene.s01518.76	0.294879
BUX.gene.s00252.94	BUX.gene.s01518.76	0.294879
BUX.gene.s01147.64	BUX.gene.s00600.44	0.294879
BUX.gene.s00600.44	BUX.gene.s01518.76	0.404588
BUX.gene.s00466.125	BUX.gene.s01518.76	0.404588
BUX.gene.s00055.271	BUX.gene.s00600.44	0.404588
BUX.gene.s00579.72	BUX.gene.s00600.44	0.404588
BUX.gene.s01518.76	BUX.gene.s00600.44	0.404588
BUX.gene.s01144.23	BUX.gene.s00600.44	0.404588
BUX.gene.s00298.32	BUX.gene.s00600.44	0.441801
BUX.gene.s00116.533	BUX.gene.s00600.44	0.539164
BUX.gene.s01254.327	BUX.gene.s00600.44	0.539164
BUX.gene.s01063.177	BUX.gene.s00600.44	0.539164
BUX.gene.s00110.134	BUX.gene.s01518.76	0.584893
BUX.gene.s01513.56	BUX.gene.s00600.44	0.584893
BUX.gene.s01259.114	BUX.gene.s01518.76	0.666916
BUX.gene.s00083.35	BUX.gene.s01518.76	0.701113
Bursaphelenchus_xylophilus_newGene_1612	BUX.gene.s00600.44	0.701113
BUX.gene.s00460.237	BUX.gene.s00600.44	0.701113
BUX.gene.s00813.67	BUX.gene.s00600.44	0.892865
BUX.gene.s00964.6	BUX.gene.s00600.44	0.892865
BUX.gene.s00139.53	BUX.gene.s00600.44	0.892865
BUX.gene.s01147.20	BUX.gene.s00600.44	1.0278
BUX.gene.s01259.114	BUX.gene.s00600.44	1.07195
BUX.gene.s01144.54	BUX.gene.s01518.76	1.11676
BUX.gene.s01259.83	BUX.gene.s01518.76	1.11676
BUX.gene.s00110.10	BUX.gene.s00600.44	1.11676
BUX.gene.s00466.180	BUX.gene.s00600.44	1.11676
BUX.gene.s00117.11	BUX.gene.s00600.44	1.11676
BUX.gene.s00422.81	BUX.gene.s00600.44	1.11676
BUX.gene.s00351.164	BUX.gene.s00600.44	1.11676
BUX.gene.s00020.1	BUX.gene.s00600.44	1.37503
BUX.gene.s00579.346	BUX.gene.s01518.76	1.66981
BUX.gene.s00422.56	BUX.gene.s01518.76	1.66981
BUX.gene.s00351.159	BUX.gene.s01518.76	1.66981
BUX.gene.s01147.154	BUX.gene.s00600.44	1.66981
BUX.gene.s00460.322	BUX.gene.s00600.44	1.66981
BUX.gene.s00139.144	BUX.gene.s01518.76	2.0031
BUX.gene.s00333.129	BUX.gene.s01518.76	2.0031
BUX.gene.s00020.1	BUX.gene.s01518.76	2.0031
BUX.gene.s00813.67	BUX.gene.s01518.76	2.0031
BUX.gene.s01144.23	BUX.gene.s01518.76	2.0031
BUX.gene.s00579.210	BUX.gene.s01518.76	2.0031
Bursaphelenchus_xylophilus_newGene_306	BUX.gene.s00600.44	2.0031
BUX.gene.s01144.110	BUX.gene.s00600.44	2.0031
BUX.gene.s00460.162	BUX.gene.s01518.76	2.37677
BUX.gene.s00579.72	BUX.gene.s01518.76	2.37677
BUX.gene.s00298.174	BUX.gene.s00600.44	2.37677
BUX.gene.s01143.156	BUX.gene.s00600.44	2.37677
BUX.gene.c07686.2	BUX.gene.s00600.44	2.37677
BUX.gene.s00298.32	BUX.gene.s01518.76	2.50932
BUX.gene.s00139.53	BUX.gene.s01518.76	2.79256
BUX.gene.s00579.211	BUX.gene.s01518.76	2.79256
BUX.gene.s00116.963	BUX.gene.s01518.76	2.79256
