# Supplementary material for: Transcriptomics and Co-expression Network Profiling of Effects of Levamisole Hydrochloride on Bursaphelenchus Xylophilus
Source: Research Square preprint supplement (doi:10.21203/rs.3.rs-142801/v1), 2021-01-11
Supplement: Supplementary file 2 [file a05c1212fa24205531ab4e69.xlsx]

## Sheet: Sheet1
TableS9. Primers used in present study
Gene ID	Gene ID	Primers Sequences (5′-3′)
Senecionine N-oxygenase	BUX.gene.s00600.44	F: 5' GGAAGTACCTTGATCGCTACG 3'
		R：5' CCTCTCCATTTCTCTTGTCCTG 3'
	BUX.gene.s00713.800	F: 5' GGATGTGAAACAGGTCTATCGG 3'
		R：5' ATATCCAAGGCTGAGTTTCCG 3'
Alcohol dehydrogenase 1	BUX.gene.s01147.198	F: 5' TCGTGCTGGTGTTAAGTGG 3'
		R: 5' CGGACTTCTGATTCTTTGAGGG 3'
	BUX.gene.s01281.195	F: 5' CTTATGACAAGCACAACTCGC 3'
		R: 5' GACTCCAACCTTATCTCCAACC 3'
Cuticle collagen	BUX.gene.s00540.1	F: 5' CATTTCATCCCCACTATCCCG 3'
		R: 5' CAACTTCCTTAGCATCTCCCTC 3'
	BUX.gene.s00252.94	F: GAAAACCGCATCAAGGCTTAC 3'
		R: TTGCAGTAGGTGATCTCGTTG 3'
Cystathionine beta-synthase	BUX.gene.s00083.35	F：5' ATGTCCTTGTTCTGGGTGTC 3'
		R：5' ATAGCGTCCTCAGATTTAACCC 3'
Endochitinase	BUX.gene.s00609.89	F: 5' AGCTGATTAAGGCCGTCAAG 3'
		R: 5' AATTTCCCCTCTCCCTTCAAC 3'
Pyruvate dehydrogenase E1 component subunit beta	BUX.gene.s01066.55	F: 5' CCCAACATACCCAGGATTTCTC 3'
		R: 5' TCATACAGCACTTCGTCTTCG 3'
Aldehyde dehydrogenase	BUX.gene.s01144.247	F: 5' GTCTCGTTTACTGGCTCCTATG 3'
		R: 5' TGCCTCGTGAACAAAGACTC 3'
Lipase 3	BUX.gene.s01661.12	F: 5' ACTCTGTTGCTCATTATCGGG 3'
		R: 5' AATGTAGCCATCTTCCGTCAC 3'
Zinc metalloproteinase	BUX.gene.s00579.211	F: 5' TCATGCTCTTGCTCTATGGC 3'
		R: 5' TCGGATCTTTGGTCAGGATTG 3'
Housekeeping gene	Bx28S	F：5' TACGATCGGTGTTCGTTGC 3'
		R：5' CTCACATCGTCGACATCCAA 3'
	Actin	F：5' GAAAGAGGGCCGGAAGAG 3'
		R：5' AGATCGTCCGCGACATAAAG 3'
