# Supplementary material for: Transcriptomics and Co-expression Network Profiling of Effects of Levamisole Hydrochloride on Bursaphelenchus Xylophilus
Source: Research Square preprint supplement (doi:10.21203/rs.3.rs-142801/v1), 2021-01-11
Supplement: Supplementary file 3 [file b49cd707f802f4edf3a4354f.xlsx]

## Sheet: Sheet1
Table S4. Core KEGG pathway of DEGs
ID	COG_class	COG_class_annotation	GO_annotation	KEGG_annotation	KOG_class	KOG_class_annotation	Swissprot_annotation	nr_annotation	Pfam_annotation	TrEMBL_annotation	KEGG_pathway_annotation
BUX.gene.s00422.687	[R]	General function prediction only	--	K00078|1.35927e-69|acs:100562900|trans-1,2-dihydrobenzene-1,2-diol dehydrogenase-like; K00078 dihydrodiol dehydrogenase / D-xylose 1-dehydrogenase (NADP) [EC:1.3.1.20 1.1.1.179] (A)	[GQ]	--	--	PREDICTED: trans-1,2-dihydrobenzene-1,2-diol dehydrogenase-like [Amphimedon queenslandica]	Oxidoreductase family, NAD-binding Rossmann fold	Uncharacterized protein {ECO:0000313|EnsemblMetazoa:PAC:15720433} OS=Amphimedon queenslandica (Sponge) PE=4 SV=1	Pentose and glucuronate interconversions (ko00040);; Metabolism of xenobiotics by cytochrome P450 (ko00980)
BUX.gene.s01147.198	[G]	Carbohydrate transport and metabolism	Molecular Function: protein binding (GO:0005515);; Biological Process: determination of adult lifespan (GO:0008340);; Molecular Function: oxidoreductase activity (GO:0016491);; Biological Process: single-organism metabolic process (GO:0044710);; Molecular Function: metal ion binding (GO:0046872);; Cellular Component: striated muscle dense body (GO:0055120);;	K13953|2.28989e-128|cel:CELE_K12G11.3|sodh-1; Protein SODH-1; K13953 alcohol dehydrogenase, propanol-preferring [EC:1.1.1.1] (A)	[Q]	Secondary metabolites biosynthesis, transport and catabolism	Alcohol dehydrogenase 1 GN=sodh-1 OS=Caenorhabditis elegans PE=1 SV=2	Protein SODH-1 [Caenorhabditis elegans]	Alcohol dehydrogenase GroES-like domain;; Zinc-binding dehydrogenase;; Zinc-binding dehydrogenase	Protein CBR-SODH-1 {ECO:0000313|EMBL:CAP39759.1} OS=Caenorhabditis briggsae PE=4 SV=1	Glycolysis / Gluconeogenesis (ko00010);; Fatty acid degradation (ko00071);; Tyrosine metabolism (ko00350);; Retinol metabolism (ko00830);; Metabolism of xenobiotics by cytochrome P450 (ko00980);; Drug metabolism - cytochrome P450 (ko00982);; Degradation of aromatic compounds (ko01220)
BUX.gene.s01281.195	[G]	Carbohydrate transport and metabolism	Molecular Function: protein binding (GO:0005515);; Biological Process: determination of adult lifespan (GO:0008340);; Molecular Function: oxidoreductase activity (GO:0016491);; Cellular Component: striated muscle dense body (GO:0055120);;	K13953|9.60973e-100|cbr:CBG23239|Cbr-sodh-1; C. briggsae CBR-SODH-1 protein; K13953 alcohol dehydrogenase, propanol-preferring [EC:1.1.1.1] (A)	[Q]	Secondary metabolites biosynthesis, transport and catabolism	Alcohol dehydrogenase 1 GN=sodh-1 OS=Caenorhabditis elegans PE=1 SV=2	CBN-SODH-2 protein [Caenorhabditis brenneri]	Alcohol dehydrogenase GroES-like domain;; Zinc-binding dehydrogenase	Putative uncharacterized protein {ECO:0000313|EMBL:EFP04270.1} OS=Caenorhabditis remanei (Caenorhabditis vulgaris) PE=4 SV=1	Glycolysis / Gluconeogenesis (ko00010);; Fatty acid degradation (ko00071);; Tyrosine metabolism (ko00350);; Retinol metabolism (ko00830);; Metabolism of xenobiotics by cytochrome P450 (ko00980);; Drug metabolism - cytochrome P450 (ko00982);; Degradation of aromatic compounds (ko01220)
BUX.gene.s01063.85	[G]	Carbohydrate transport and metabolism	Molecular Function: protein binding (GO:0005515);; Biological Process: determination of adult lifespan (GO:0008340);; Molecular Function: oxidoreductase activity (GO:0016491);; Cellular Component: striated muscle dense body (GO:0055120);;	K13953|1.58299e-69|cel:CELE_K12G11.4|sodh-2; Protein SODH-2; K13953 alcohol dehydrogenase, propanol-preferring [EC:1.1.1.1] (A)	[Q]	Secondary metabolites biosynthesis, transport and catabolism	Alcohol dehydrogenase 2 GN=sodh-2 OS=Caenorhabditis elegans PE=3 SV=1	hypothetical protein CRE_27340 [Caenorhabditis remanei]	Zinc-binding dehydrogenase;; Alcohol dehydrogenase GroES-like domain;; Zinc-binding dehydrogenase	Putative uncharacterized protein {ECO:0000313|EMBL:EFP05661.1} OS=Caenorhabditis remanei (Caenorhabditis vulgaris) PE=4 SV=1	Glycolysis / Gluconeogenesis (ko00010);; Fatty acid degradation (ko00071);; Tyrosine metabolism (ko00350);; Retinol metabolism (ko00830);; Metabolism of xenobiotics by cytochrome P450 (ko00980);; Drug metabolism - cytochrome P450 (ko00982);; Degradation of aromatic compounds (ko01220)
BUX.gene.s01518.76	[Q]	Secondary metabolites biosynthesis, transport and catabolism	--	K13299|6.26064e-23|cbr:CBG10410|Hypothetical protein CBG10410; K13299 glutathione S-transferase kappa 1 [EC:2.5.1.18] (A)	--	--	Glutathione S-transferase kappa 1 GN=gstk-1 OS=Caenorhabditis elegans PE=3 SV=1	DsbA-like protein [Oesophagostomum dentatum]	DSBA-like thioredoxin domain	DSBA oxidoreductase domain containing protein {ECO:0000313|EMBL:CDL94126.1} OS=Haemonchus contortus (Barber pole worm) PE=4 SV=1	Glutathione metabolism (ko00480);; Metabolism of xenobiotics by cytochrome P450 (ko00980);; Drug metabolism - cytochrome P450 (ko00982);; Peroxisome (ko04146)
BUX.gene.s00298.34	[R]	General function prediction only	Molecular Function: catalytic activity (GO:0003824);; Cellular Component: membrane (GO:0016020);; Biological Process: positive regulation of growth rate (GO:0040010);; Cellular Component: intracellular membrane-bounded organelle (GO:0043231);;	K01253|9.6627e-57|cel:CELE_W01A11.1|W01A11.1; Protein W01A11.1; K01253 microsomal epoxide hydrolase [EC:3.3.2.9] (A)	[R]	General function prediction only	Juvenile hormone epoxide hydrolase 1 OS=Ctenocephalides felis (Cat flea) PE=1 SV=3	hydrolase, alpha/beta domain protein [Necator americanus]	Epoxide hydrolase N terminus	Hydrolase, alpha/beta domain protein {ECO:0000313|EMBL:ETN78999.1} OS=Necator americanus (Human hookworm) PE=4 SV=1	Metabolism of xenobiotics by cytochrome P450 (ko00980)
BUX.gene.s00647.119	[O]	Posttranslational modification, protein turnover, chaperones	Biological Process: cellular process (GO:0009987);; Biological Process: single-organism process (GO:0044699);;	K00799|4.07984e-35|cel:CELE_F11G11.3|gst-6; Protein GST-6; K00799 glutathione S-transferase [EC:2.5.1.18] (A)	[O]	Posttranslational modification, protein turnover, chaperones	Glutathione S-transferase 6 GN=gst-6 OS=Caenorhabditis elegans PE=3 SV=2	glutathione S-transferase protein [Ancylostoma duodenale]; Chain A, Crystal Structure Of Monomeric Na-gst-3, A Glutathione S-transferase From The Major Human Hookworm Parasite Necator Americanus	Glutathione S-transferase, N-terminal domain;; Glutathione S-transferase, C-terminal domain;; Glutathione S-transferase, N-terminal domain	Uncharacterized protein {ECO:0000313|EnsemblMetazoa:PPA04701} OS=Pristionchus pacificus (Parasitic nematode) PE=4 SV=1	Glutathione metabolism (ko00480);; Metabolism of xenobiotics by cytochrome P450 (ko00980);; Drug metabolism - cytochrome P450 (ko00982)
BUX.gene.s00983.18	[G]	Carbohydrate transport and metabolism	--	K00699|2.50272e-45|cbr:CBG18047|Cbr-ugt-62; C. briggsae CBR-UGT-62 protein; K00699 glucuronosyltransferase [EC:2.4.1.17] (A)	[GC]	--	UDP-glucuronosyltransferase ugt-47 (Precursor) GN=ugt-47 OS=Caenorhabditis elegans PE=1 SV=2	UDP-glucoronosyl and UDP-glucosyl transferase [Necator americanus]	UDP-glucoronosyl and UDP-glucosyl transferase;; Glycosyl transferase family 1;; Glycosyltransferase family 28 C-terminal domain	UDP-glucuronosyltransferase ugt-47 {ECO:0000313|EMBL:ADY44399.1} OS=Ascaris suum (Pig roundworm) PE=2 SV=1	Pentose and glucuronate interconversions (ko00040);; Ascorbate and aldarate metabolism (ko00053);; Starch and sucrose metabolism (ko00500);; Retinol metabolism (ko00830);; Porphyrin and chlorophyll metabolism (ko00860);; Metabolism of xenobiotics by cytochrome P450 (ko00980);; Drug metabolism - cytochrome P450 (ko00982);; Drug metabolism - other enzymes (ko00983)
BUX.gene.s01147.195	[G]	Carbohydrate transport and metabolism	--	K00699|1.27196e-102|cbr:CBG09373|Cbr-ugt-48; C. briggsae CBR-UGT-48 protein; K00699 glucuronosyltransferase [EC:2.4.1.17] (A)	[GC]	--	UDP-glucuronosyltransferase ugt-48 (Precursor) GN=ugt-48 OS=Caenorhabditis elegans PE=1 SV=3	UDP-glucuronosyl UDP-glucosyltransferase domain containing protein [Haemonchus contortus]	UDP-glucoronosyl and UDP-glucosyl transferase;; Glycosyltransferase family 28 C-terminal domain	UDP-glucuronosyl UDP-glucosyltransferase domain containing protein {ECO:0000313|EMBL:CDJ94501.1} OS=Haemonchus contortus (Barber pole worm) PE=4 SV=1	Pentose and glucuronate interconversions (ko00040);; Ascorbate and aldarate metabolism (ko00053);; Starch and sucrose metabolism (ko00500);; Retinol metabolism (ko00830);; Porphyrin and chlorophyll metabolism (ko00860);; Metabolism of xenobiotics by cytochrome P450 (ko00980);; Drug metabolism - cytochrome P450 (ko00982);; Drug metabolism - other enzymes (ko00983)
BUX.gene.s00600.44	[P]	Inorganic ion transport and metabolism	Biological Process: reproduction (GO:0000003);; Molecular Function: nucleotide binding (GO:0000166);; Cellular Component: endoplasmic reticulum (GO:0005783);; Biological Process: metabolic process (GO:0008152);; Molecular Function: oxidoreductase activity (GO:0016491);; Molecular Function: oxidoreductase activity, acting on paired donors, with incorporation or reduction of molecular oxygen, NAD(P…	K00485|2.4897e-173|cel:CELE_K08C7.2|fmo-1; Protein FMO-1; K00485 dimethylaniline monooxygenase (N-oxide forming) [EC:1.14.13.8] (A)	[Q]	Secondary metabolites biosynthesis, transport and catabolism	Senecionine N-oxygenase (Precursor) GN=sno1 OS=Tyria jacobaeae (Cinnabar moth) PE=1 SV=1	Flavin-containing monooxygenase FMO domain containing protein [Haemonchus contortus]	Flavin-binding monooxygenase-like;; Pyridine nucleotide-disulphide oxidoreductase;; Pyridine nucleotide-disulphide oxidoreductase;; L-lysine 6-monooxygenase (NADPH-requiring);; Pyridine nucleotide-disulphide oxidoreductase;; NAD(P)-binding Rossmann-like domain;; FAD-NAD(P)-binding	Dimethylaniline monooxygenase [N-oxide-forming] {ECO:0000256|PIRNR:PIRNR000332} OS=Haemonchus contortus (Barber pole worm) PE=3 SV=1	Drug metabolism - cytochrome P450 (ko00982)
BUX.gene.s00713.800	[P]	Inorganic ion transport and metabolism	Molecular Function: N,N-dimethylaniline monooxygenase activity (GO:0004499);; Cellular Component: endoplasmic reticulum membrane (GO:0005789);; Biological Process: embryo development ending in birth or egg hatching (GO:0009792);; Molecular Function: oxidoreductase activity (GO:0016491);; Cellular Component: intrinsic component of membrane (GO:0031224);; Molecular Function: flavin adenine dinucleo…	K00485|0|cbr:CBG11527|Cbr-fmo-4; C. briggsae CBR-FMO-4 protein; K00485 dimethylaniline monooxygenase (N-oxide forming) [EC:1.14.13.8] (A)	[Q]	Secondary metabolites biosynthesis, transport and catabolism	Senecionine N-oxygenase (Precursor) GN=sno1 OS=Tyria jacobaeae (Cinnabar moth) PE=1 SV=1	Flavin monooxygenase FMO family and Flavin monooxygenase (FMO) 5 family and Dimethylaniline monooxygenase, N-oxide-forming family and Flavin monooxygenase-like family-containing protein [Strongyloides ratti]	Flavin-binding monooxygenase-like;; Pyridine nucleotide-disulphide oxidoreductase;; Pyridine nucleotide-disulphide oxidoreductase;; L-lysine 6-monooxygenase (NADPH-requiring);; FAD-NAD(P)-binding;; NAD(P)-binding Rossmann-like domain;; Thi4 family	Flavin monooxygenase FMO family and Flavin monooxygenase (FMO) 5 family and Dimethylaniline monooxygenase, N-oxide-forming family and Flavin monooxygenase-like family-containing protein {ECO:0000313|EMBL:CEF60893.1} OS=Strongyloides ratti (Parasitic roundworm) PE=4 SV=1	Drug metabolism - cytochrome P450 (ko00982)
BUX.gene.s01092.255	[P]	Inorganic ion transport and metabolism	Biological Process: reproduction (GO:0000003);; Molecular Function: monooxygenase activity (GO:0004497);; Cellular Component: membrane (GO:0016020);; Cellular Component: intracellular membrane-bounded organelle (GO:0043231);;	K00485|3.98081e-156|cel:CELE_K08C7.5|fmo-2; Protein FMO-2; K00485 dimethylaniline monooxygenase (N-oxide forming) [EC:1.14.13.8] (A)	[Q]	Secondary metabolites biosynthesis, transport and catabolism	Senecionine N-oxygenase (Precursor) GN=sno1 OS=Tyria jacobaeae (Cinnabar moth) PE=1 SV=1	Dimethylaniline monooxygenase [N-oxide-forming] 5 [Toxocara canis]	Flavin-binding monooxygenase-like;; Pyridine nucleotide-disulphide oxidoreductase;; L-lysine 6-monooxygenase (NADPH-requiring);; Pyridine nucleotide-disulphide oxidoreductase;; NAD(P)-binding Rossmann-like domain	Dimethylaniline monooxygenase [N-oxide-forming] {ECO:0000256|PIRNR:PIRNR000332} OS=Haemonchus contortus (Barber pole worm) PE=3 SV=1	Drug metabolism - cytochrome P450 (ko00982)
BUX.gene.s01167.44	[P]	Inorganic ion transport and metabolism	Biological Process: reproduction (GO:0000003);; Cellular Component: endoplasmic reticulum (GO:0005783);; Molecular Function: oxidoreductase activity (GO:0016491);; Cellular Component: organelle membrane (GO:0031090);; Cellular Component: membrane part (GO:0044425);;	K00485|3.37404e-174|cel:CELE_K08C7.5|fmo-2; Protein FMO-2; K00485 dimethylaniline monooxygenase (N-oxide forming) [EC:1.14.13.8] (A)	[Q]	Secondary metabolites biosynthesis, transport and catabolism	Senecionine N-oxygenase (Precursor) GN=sno1 OS=Tyria jacobaeae (Cinnabar moth) PE=1 SV=1	Flavin-containing monooxygenase FMO domain containing protein [Haemonchus contortus]	Flavin-binding monooxygenase-like;; Pyridine nucleotide-disulphide oxidoreductase;; L-lysine 6-monooxygenase (NADPH-requiring);; Pyridine nucleotide-disulphide oxidoreductase;; Pyridine nucleotide-disulphide oxidoreductase;; FAD-NAD(P)-binding;; NAD(P)-binding Rossmann-like domain	Dimethylaniline monooxygenase [N-oxide-forming] {ECO:0000256|PIRNR:PIRNR000332} OS=Haemonchus contortus (Barber pole worm) PE=3 SV=1	Drug metabolism - cytochrome P450 (ko00982)
